# Supplementary material for: Mapping the self-generated magnetic fields due to thermal Weibel instability
Source: PubMed Central journal article supplement (PMC9897480; doi:10.1073/pnas.2211713119), 2022-12-05
Supplement: pnas.2211713119.sapp.pdf [file pnas.2211713119.sapp.pdf]

## Supplementary Information for

### Mapping the self-generated magnetic fields due to thermal Weibel instability

Chaojie Zhang<sup>1,\*</sup>, Yipeng Wu<sup>1,†</sup>, Mitchell Sinclair<sup>1</sup>, Audrey Farrell<sup>1</sup>, Kenneth A. Marsh<sup>1</sup>, Irina Petrushina<sup>2</sup>, Navid Vafaei-Najafabadi<sup>2,3</sup>, Apurva Gaikwad<sup>2</sup>, Rotem Kupfer<sup>3</sup>, Karl Kusche<sup>3</sup>, Mikhail Fedurin<sup>3</sup>, Igor Pogorelsky<sup>3</sup>, Mikhail Polyanskiy<sup>3</sup>, Chen-Kang Huang<sup>4</sup>, Jianfei Hua<sup>5</sup>, Wei Lu<sup>5</sup>, Warren B. Mori<sup>1,6</sup>, Chan Joshi<sup>1,‡</sup>

\* Chaojie Zhang, Yipeng Wu, Chan Joshi

Email: [chaojiez@ucla.edu](mailto:chaojiez@ucla.edu), [wuyipeng@ucla.edu](mailto:wuyipeng@ucla.edu), [cjoshi@ucla.edu](mailto:cjoshi@ucla.edu)

#### This PDF file includes:

Supplementary text  
Figures S1 to S6  
Legends for Movies S1 to S3

#### Other supplementary materials for this manuscript include the following:

Movies S1 to S3

## 39 **Supplementary Information Text**

40

### 41 **Time jitter of the e- probe with respect to the CO<sub>2</sub> laser**

42 In the experiment, the e- probe was synchronized to the CO<sub>2</sub> laser and the time jitter between the  
43 two was estimated by recording the propagation of the CO<sub>2</sub> ionization front in an underdense  
44 plasma using the e- probe. A dataset is shown in Fig. S1 where (a)-(d) show four shots where the  
45 delay of the CO<sub>2</sub> laser was changed using a translation stage. The white arrows mark the position  
46 of the ionization front. In Fig. S1e, the ionization front location is plotted as a function of the CO<sub>2</sub>  
47 delay. The orange line shows a linear fit to the data. From the fit we extracted the propagation  
48 velocity of the ionization front to be  $v \approx 0.92 \pm 0.14c$ . The group velocity of the CO<sub>2</sub> laser depends  
49 on the plasma density  $n_p$ , namely,  $v_g = c\sqrt{1 - n_p/n_c}$  where  $n_c \approx 1.3 \times 10^{19} \text{ cm}^{-3}$  is the critical  
50 density for the CO<sub>2</sub> laser. Using the measured propagation velocity, we can estimate the plasma  
51 density to be  $\sim 2 \times 10^{18} \text{ cm}^{-3}$  which is in good agreement with the density  $(1.8 \pm 0.2) \times 10^{18} \text{ cm}^{-3}$   
52 measured using the ionization induced plasma grating method (see later). The linear fit in Fig. S1e  
53 gives the position of CO<sub>2</sub> laser for each delay. The actual data point differs from this line because  
54 of the time jitter between the laser and the electron probe. For instance, if the electron probe comes  
55 later than it should in the (ideal) no-jitter case, the ionization front of the CO<sub>2</sub> laser has moved  
56 further to the left in the frame. Therefore, the difference between the blue dots (measured) and the  
57 orange line (estimated) ionization front in Fig. S1e, after being converted to time, gives the arrival  
58 time of the electron probe with respect to the CO<sub>2</sub> laser, which is plotted in Fig. S1f. Here a positive  
59 arrival time means the electron probe comes later than in the no-jitter case. Using this dataset, the  
60 RMS jitter between the CO<sub>2</sub> laser and the electron probe is calculated to be  $\sigma \approx 0.4 \text{ ps}$ .

61

### 62 **Maxwellian fitting residuals**

63 The EVDs deduced from 3D PIC simulation are shown by the blue curves in Fig. 1C. These EVDs  
64 can be well fitted by Maxwellian distributions with  $r^2 > 0.997$ . The fitting residuals are shown in Fig.  
65 S2 to further illustrate the goodness of fit. In all three cases, for the major part of the distribution,  
66 the deviation of the EVD from a Maxwellian distribution is less than 0.05. In other words, the plasma  
67 indeed has the required temperature anisotropy for driving the Weibel instability.

68

### 69 **Retrieve the k-dependent growth rates**

70 Using the time-resolved measurements shown in Fig. 3C and D, we have retrieved the  $k$ -dependent  
71 growth rates of the  $B_x$  and  $B_y$  components. These are shown in Fig. 3E and F, respectively. In Figs.  
72 S3 and S4 we show the measured growth of the magnetic field components and the exponential fit

73 to the data for several representative wavevectors. In each subplot of Fig. S3, the blue circles  
 74 represent the measured  $B_x$  field component (on log scale) with a specific wavevector  $k_y$ . The data  
 75 shows that the magnetic field grows rapidly and then reaches saturation very quickly within a few  
 76 ps. By assuming an exponential growth, we have fitted the data using the first two points to extract  
 77 the growth rate. The fitting curve is shown by the red dashed line in each subplot. The retrieved  $k$ -  
 78 dependent growth rate for  $B_x$  is shown by the blue curve in Fig. 3E. It's important to remember that  
 79 the dynamic range of our data is less than a factor of 30. This means that if one is interested in  
 80 collecting data about the saturated value of the magnetic field, the number of data points leading  
 81 up to that saturated value are going to be limited to two or at most three. This is why in Fig.S3 and  
 82 S4 below the growth rate has to be derived from mostly two values of magnitude of  $B_{x,y}$  vs. time.  
 83 A similar analysis was done for the  $B_y$  field and the results are plotted in Fig. S4. The retrieved  $k$ -  
 84 dependent growth rate for  $B_x$  is shown by the orange curve in Fig. 3F.

85 As we have mentioned in the main text, it is also possible to extract the  $k$ -resolved growth rate  
 86 for  $B_x$  by doing an intraframe analysis of the measured density directly. In the 3.3 ps frame (shown  
 87 in Fig. 1D), the density strips are quasi-parallel to the horizontal direction, which implies that they  
 88 are predominantly caused by the probe electrons being deflected by the  $B_x$  field. Here we assume  
 89 that each column in the image of the measured modulated probe flux is caused by the 1D  $B_x$  field  
 90 and neglect the contribution of  $B_y$ . At each horizontal position  $x$ , the local  $B_x$  field causes  
 91 deflections of probe electrons with an angle distribution of  $\theta_y \approx -\frac{e \int B_x dz}{\gamma m_e c}$ . For the quasi-parallel  
 92 probe beam used in the experiment, such an angle deflection will develop into a displacement of  
 93 the electrons,  $y = y_0 + \theta_y L$  after a propagation distance  $L$ , which corresponds to a modulated  
 94 probe flux distribution

$$95 \quad n = \frac{n_0}{|1 + (\partial\theta_y/\partial y_0)L|}$$

96 here  $n_0$  is unperturbed probe flux distribution (background),  $y_0$  is the original position of the  
 97 undeflected electron. In the small-deflection regime where  $\frac{\partial\theta_y}{\partial y_0}L > -1$ , the measured probe flux  
 98 distribution is uniquely determined by the deflection angle and the magnetic field,

$$99 \quad \frac{1}{L} \left( \frac{n_0}{n} - 1 \right) = \frac{\partial\theta_y}{\partial y_0} = -\frac{eW}{\gamma m_e c} \frac{\partial \bar{B}_x}{\partial y_0}$$

100 where we have used  $\int B_x dz = \bar{B}_x W$ , here  $W$  is the width of the field and  $\bar{B}_x$  is the average field.  
 101 Taking the Fourier analysis, we have

$$102 \quad \text{FFT} \left[ \frac{1}{L} \left( \frac{n_0}{n} - 1 \right) \right] = -\frac{eW}{\gamma m_e c} \text{FFT} \left[ \frac{\partial \bar{B}_x}{\partial y_0} \right] = -\frac{eW}{\gamma m_e c} i k_y \bar{B}_x(k_y)$$

103 This means that the  $k_y$  spectrum of  $\bar{B}_x$  at each  $x$  position can be calculated by taking the Fourier  
104 analysis of  $\frac{n_0}{n} - 1$ , which is determined from measurements.

105 Figure S5 summarizes the analysis procedure. The measured probe flux distribution is shown  
106 in Fig. S5a (the same data as in the 3.3 ps frame in Fig. 1D). A synthetic background image was  
107 constructed by smoothing the data image column-by-column using a code based on a penalized  
108 least squares method. Then the quantity  $\frac{n}{n_0} - 1$  that is proportional to the spatial gradient of the  
109 path-integrated magnetic field was calculated using Figs. S5a and b. By taking 1D Fourier analysis  
110 of each column of Fig. S5c, the time-resolved  $k$  spectrum of the magnetic field was calculated and  
111 is shown in Fig. S5d. Note that the constant coefficient has been dropped for clarity and this does  
112 not affect the extraction of growth rate. In Fig. S5e we show a representative lineout of the  
113 calculated magnetic field spectrum taken at  $\frac{k_y}{2\pi} \approx 0.02 \mu\text{m}^{-1}$  where the signal appears to grow the  
114 fastest. The signal (blue curve) clearly shows that the signal grows exponentially and has increased  
115 by more than a factor of ten within the delay range of 1-3 ps. The orange solid line represents the  
116 best fit to the data. The slope of the line gives the growth rate of the signal. By repeating the same  
117 analysis for every  $k_y$  (each row of Fig. S5d), the  $k$ -resolved growth rate of the magnetic field was  
118 retrieved and is shown in Fig. S5f. The error bars represent the 95% confidence interval of the fit.  
119 The curve shown here in Fig. S5f is the same as the green curve in Fig. 3E.

120

## 121 **Plasma density**

122 The anisotropic plasma in the experiment was produced by ionizing a supersonic gas jet emanating  
123 from a nozzle with 5-mm diameter opening by the CO<sub>2</sub> laser. The density profile of the gas jet was  
124 characterized using an ionization-plasma-grating-based method in a separate laboratory. The  
125 results are shown in Fig. S6.

126 In this offline measurement, the backing pressure (87 psig) and the nominal height of the laser  
127 with respect to the nozzle exit (H=2.5 mm) were kept the same as in the ATF experiment. The laser  
128 was put in the center of the gas jet. The density profile of the neutral hydrogen gas jet corresponding  
129 to this condition is shown by the blue curve in Fig. S6. In the experiment, there are some  
130 uncertainties in determining the laser position with respect to the nozzle exit. To account for this,  
131 we have shifted the laser in either the vertical (H=3.0 mm) or horizontal (H=2.5 mm, X=0.5 mm)  
132 direction to verify the change in the plasma density. The results are shown by the orange and green  
133 curves, respectively. It is seen that the overall density profile remains similar and only the peak  
134 density varies. The average plasma density in the plateau region (e.g., averaged within  $|x| \leq 0.6$   
135 mm) is  $(1.8 \pm 0.2) \times 10^{18} \text{ cm}^{-3}$ .

136

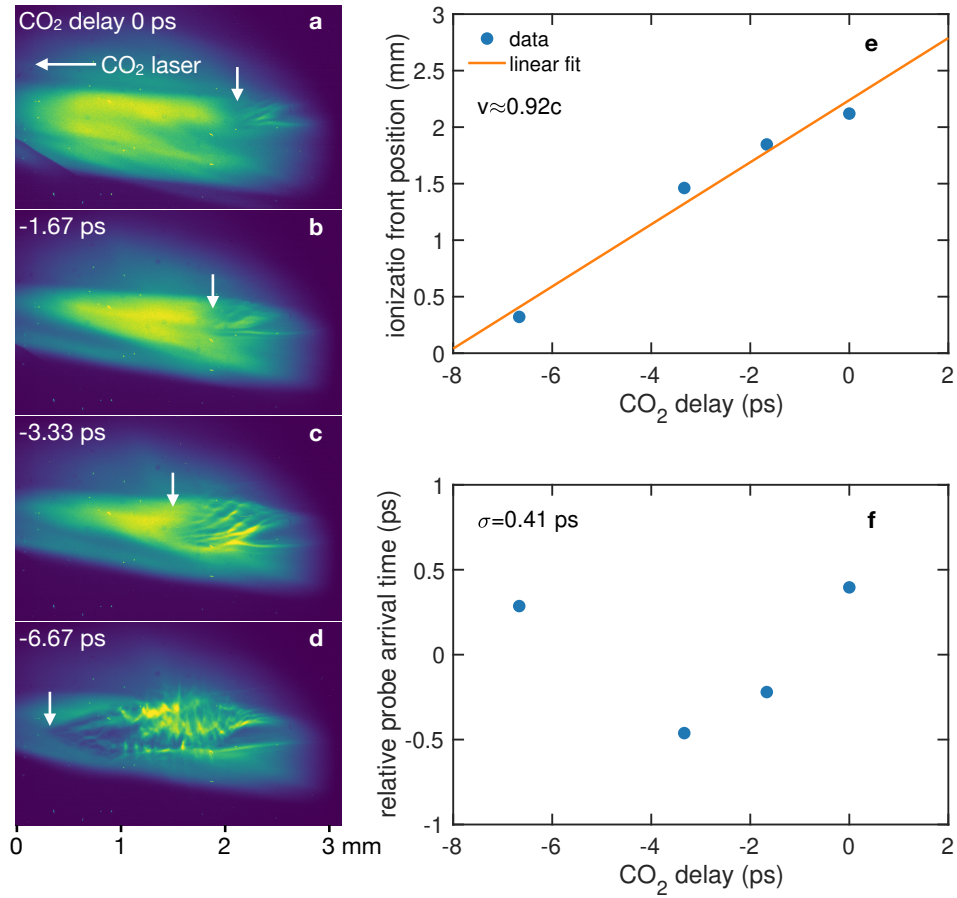

137

138 **Fig. S1.** Visualization of the propagation of the CO<sub>2</sub> laser ionization front and deduced timing jitter.  
 139 (a)-(d) show four frames where the CO<sub>2</sub> laser delay is changed and the propagation of the ionization  
 140 front from right to left is visible (in each frame the location of the ionization front is marked by the  
 141 white arrow). (e) shows the ionization front position as a function of CO<sub>2</sub> delay. (f) The relative  
 142 arrival time of the electron probe. Positive number means the probe arrives later.

143

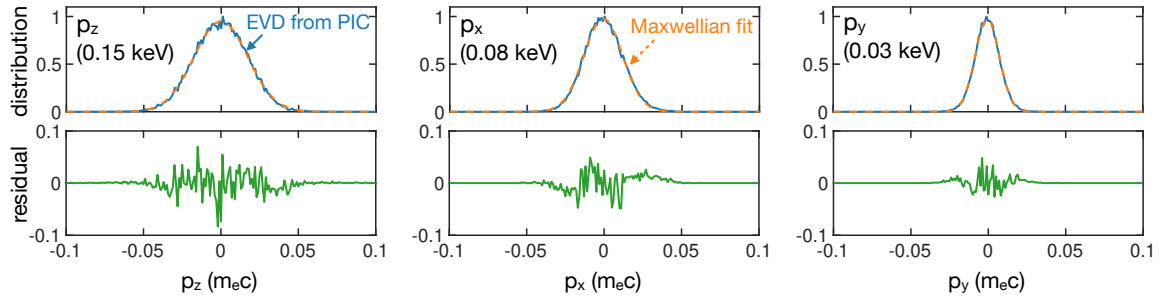

144

145 **Fig. S2.** EVDs from 3D PIC simulation and Maxwellian fits. The top row is reproduced from Fig.  
 146 1C. The bottom row shows the fit residuals for the three EVDs.

147

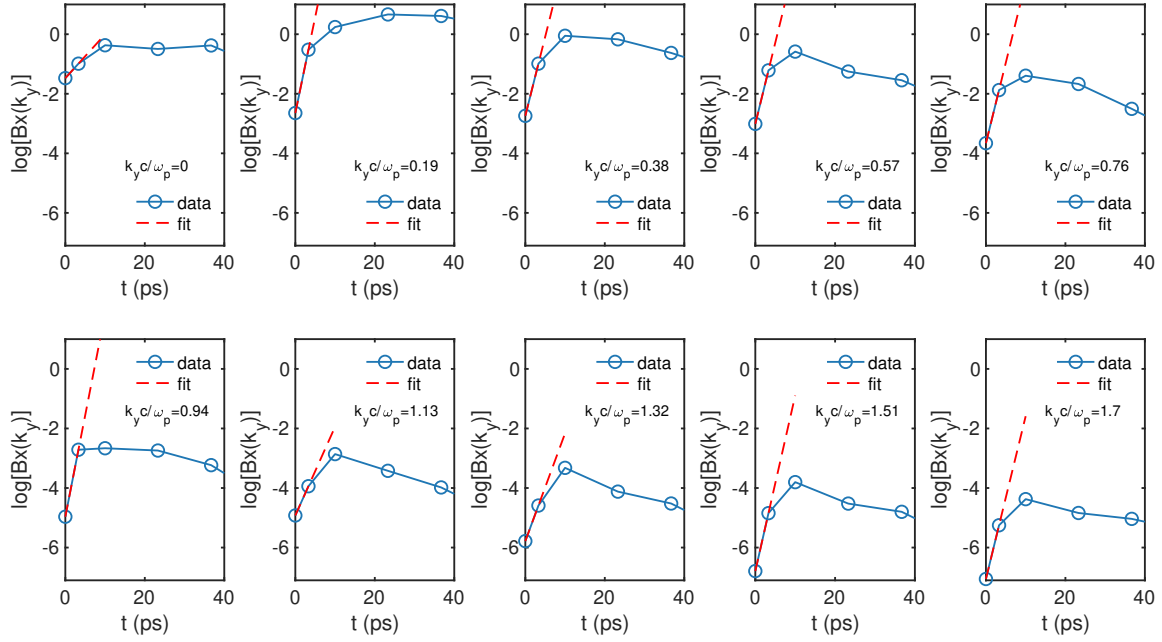

148

149 **Fig. S3.** Measured growth of the  $B_x$  field at several representative  $k_y$  (blue circles) and the  
 150 exponential fit to the data (red dashed lines).

151

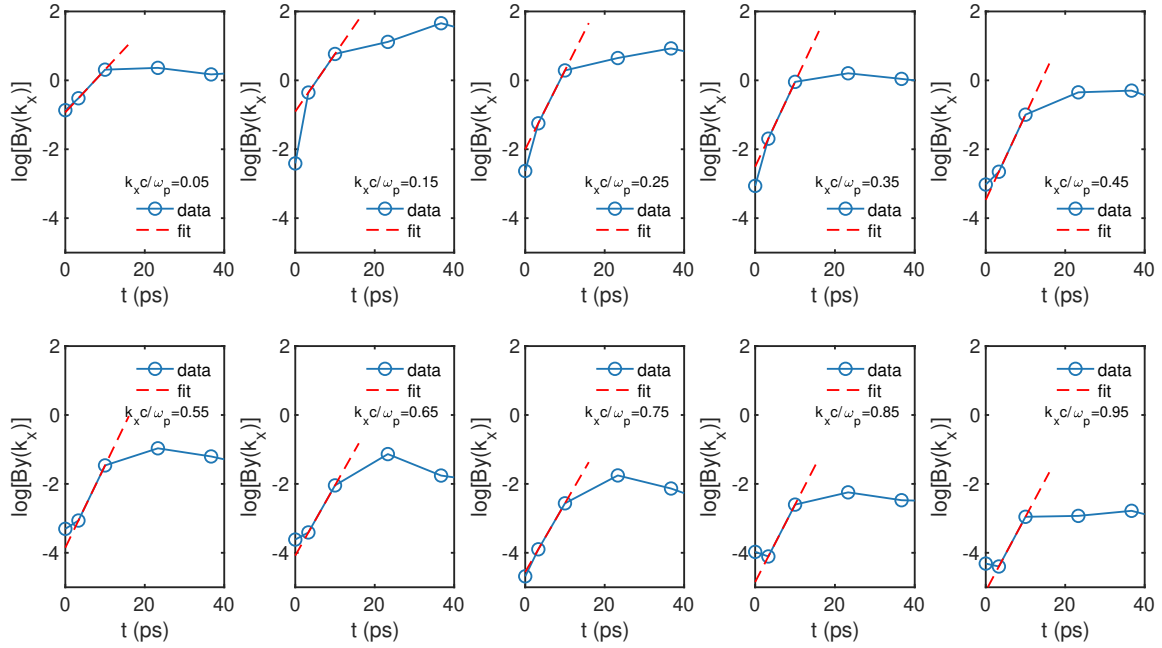

152

153 **Fig. S4.** Measured growth of the  $B_y$  field at representative  $k_x$  (blue circles) and exponential fit to  
 154 the data (red dashed lines).

155



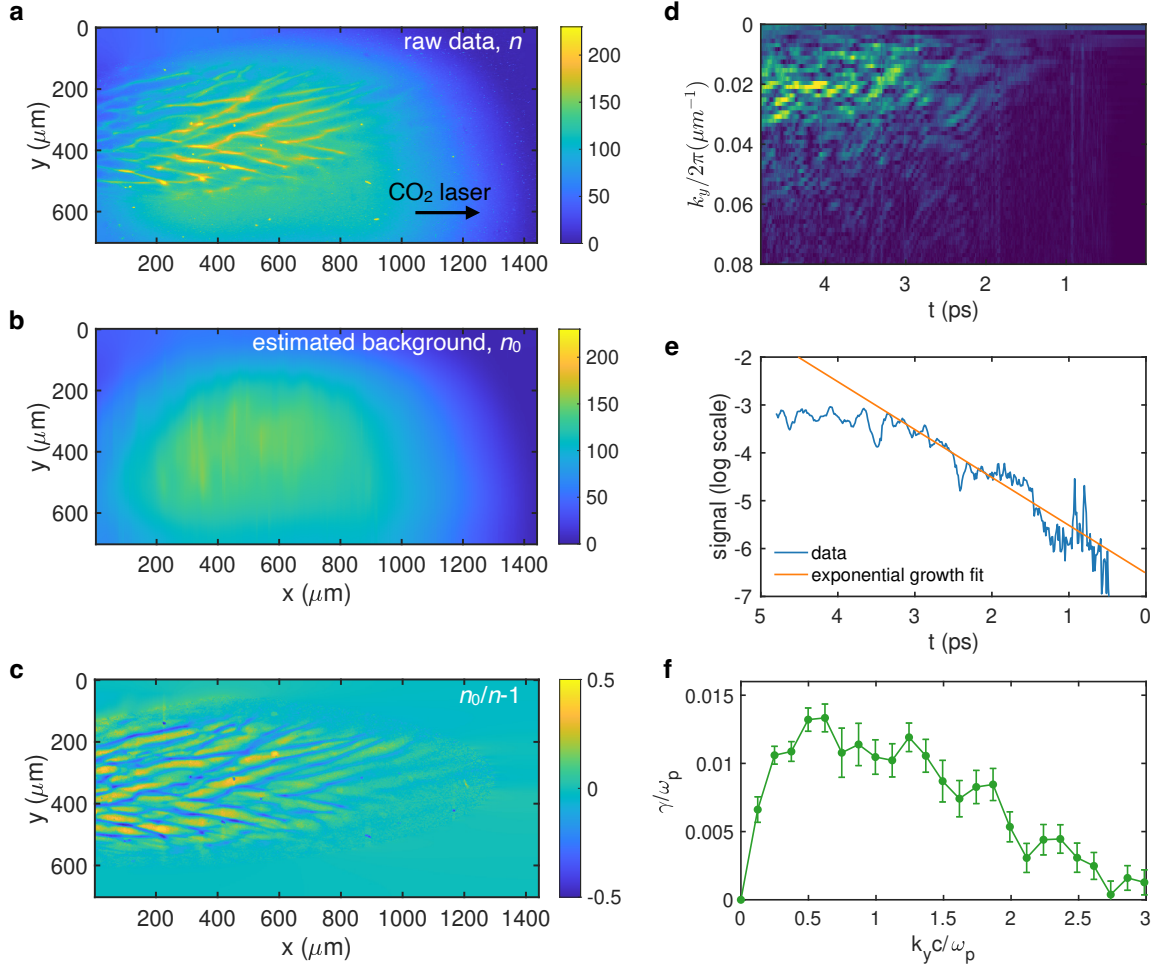

156

157 **Fig. S5.** Methodology used to deduce  $k$ -dependent growth rate of  $B_x$  using the measured  
 158 modulated probe flux data. (a) Measured probe flux  $n$  (same as the 3.3 ps frame in Fig. 1D). (b)  
 159 Estimated background  $n_0$  by smoothing the data in (a) column-by-column. (c) The quantity  $\frac{n_0}{n} - 1$   
 160 that is proportional to the gradient of the path-integrated magnetic field. (d) Calculated  $k_y$  spectrum  
 161 of the  $B_x$  [i.e.,  $k_y \bar{B}_x(k_y)$ ] by taking 1D Fourier transform of (c) column-by-column. The horizontal  
 162 axis has been converted to relative delay by setting the right edge of the image in c ( $x=1440$ ) to be  
 163 time zero. (e) A lineout of the spectrum taken at  $\frac{k_y}{2\pi} \approx 0.02 \mu\text{m}^{-1}$  (blue curve, in log scale). The  
 164 orange line shows the exponential fit to the data within the range of 1-3 ps. (f) Retrieved  $k$ -resolved  
 165 growth rate by performing similar analysis for all different  $k_y$ . This is the green curve in Fig 3E of  
 166 the manuscript.

167

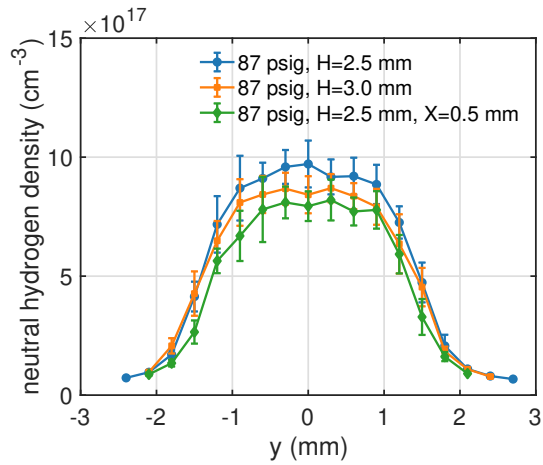

168

169 **Fig. S6.** Measured plasma density profile. The backing pressure is the same as in the experiment.  
 170 The laser was put at the center of the gas jet and  $\sim 2.5$  mm away from the nozzle exit, which  
 171 corresponds to the  $H=2.5$  mm line. The two other lines ( $H=3.0$  mm and  $H=2.5$  mm,  $X=0.5$  mm)  
 172 represent a 0.5 mm shift in either the vertical or horizontal direction to account for the uncertainty  
 173 in determining the laser position with respect to the nozzle exit.  
 174

175 **Movies of the electron probe density, retrieved magnetic fields and plasma current density**

176 By changing the delay of the electron probe beam with respect to the CO<sub>2</sub> laser, a movie of the  
177 density bunching of the electron probe due to deflections caused by the Weibel magnetic fields was  
178 recorded, from which we retrieved the magnetic fields and plasma current density evolution. These  
179 movies are uploaded separately.

180

181 **Movie S1 (separate file).** Evolution of the measured bunching of electron probe.

182 **Movie S2 (separate file).** Evolution of the retrieved magnetic field components.

183 **Movie S3 (separate file).** Evolution of the retrieved plasma current density.
